# Supplementary material for: Voxel Scale Complex Networks of Functional Connectivity in the Rat Brain: Neurochemical State Dependence of Global and Local Topological Properties
Source: Hindawi journal article supplement (doi:10.1155/2012/615709), 2012-01-01
Supplement: f2 [file 615709.f2.doc]

*Supplementary Data* for MS entitled

**“Voxel scale complex networks of functional connectivity in the rat brain: neurochemical state dependence of global and local topological properties,”**

A.J. Schwarz, A. Gozzi, A. Bifone

1. **Robustness of Network Properties to Binarization Threshold**

The networks in this study were thresholded to generate binarized versions for computational tractability. For a ‘middle ground’ range of binarization thresholds, avoiding the loss of topological information due to retaining too few or too many unweighted edges, the relative anatomical distribution of the network parameters is robust to the precise value of the binarization threshold, as illustrated in **Figs. S1-S9**. Each of these figures presents anatomical distributions for a range of binarization thresholds specified as sparsities (fixed fraction of edges) ranging from 1% to 10%.

For the results presented in the main manuscript, in order to maintain equivalence in the topological information contained within each network, we selected thresholds *z*thresh such that the strongest 2% of the edges were retained for each – that is, we worked with equi-sparse networks, consistent with our previous publications in which differential community structure was computed for each of these networks (Schwarz et al., 2009).

The similarity in the anatomical distributions of the nodewise *k* and *c* parameters was also assessed quantitatively by computing the spatial correlation between different binarization thresholds (**Table S1**). For equi-sparse networks binarized by retaining the 1%, 2%, 5% and 10% strongest connections, the spatial correlations between different thresholds ranged from r=0.816 to r=0.995 (p<<0.0001) for maps of *k*, and r=0.328 to r=0.816 (p<<0.0001) for maps of *c*.

**Table S1:** Spatial correlation between nodewise parameter maps thresholded at different sparsities.

|  | k | | | | c | | | |
| --- | --- | --- | --- | --- | --- | --- | --- | --- |
|  | **amp** | **flx** | **nic** | **veh** | **amp** | **flx** | **nic** | **veh** |
| **1% v 2%** | 0.979 | 0.992 | 0.972 | 0.995 | 0.74 | 0.673 | 0.525 | 0.569 |
| **1% v 5%** | 0.906 | 0.961 | 0.910 | 0.983 | 0.606 | 0.518 | 0.400 | 0.368 |
| **1% v 10%** | 0.816 | 0.905 | 0.854 | 0.955 | 0.507 | 0.454 | 0.328 | 0.355 |
| **2% v 5%** | 0.968 | 0.985 | 0.976 | 0.994 | 0.816 | 0.642 | 0.608 | 0.537 |
| **2% v 10%** | 0.899 | 0.943 | 0.938 | 0.974 | 0.686 | 0.519 | 0.505 | 0.432 |
| **5% v 10%** | 0.975 | 0.983 | 0.988 | 0.991 | 0.915 | 0.697 | 0.767 | 0.568 |


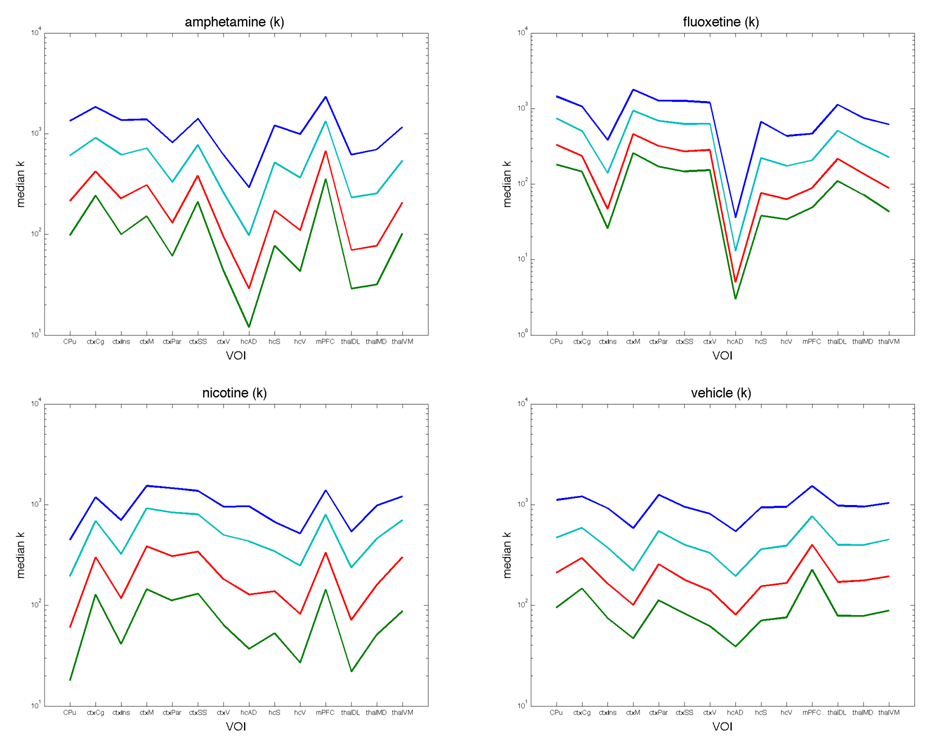


**Figure S1:** Median node degree across VOIs as a function of different network sparsities. The relative anatomical profiles are robust to the precise choice of threshold. [Blue = 10% sparsity; Teal = 5%; Red = 2% ; Green = 1%].


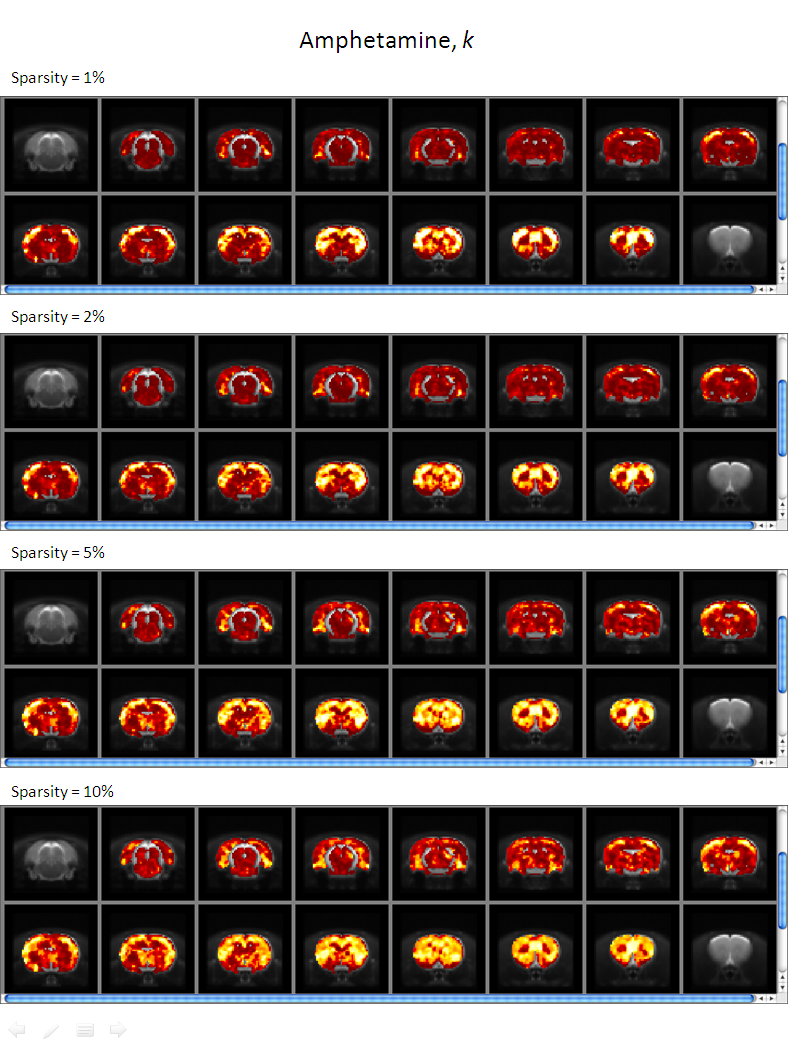


**Figure S2:** Maps of *k* as a function of binarization threshold, for the *d*-amphetamine network.


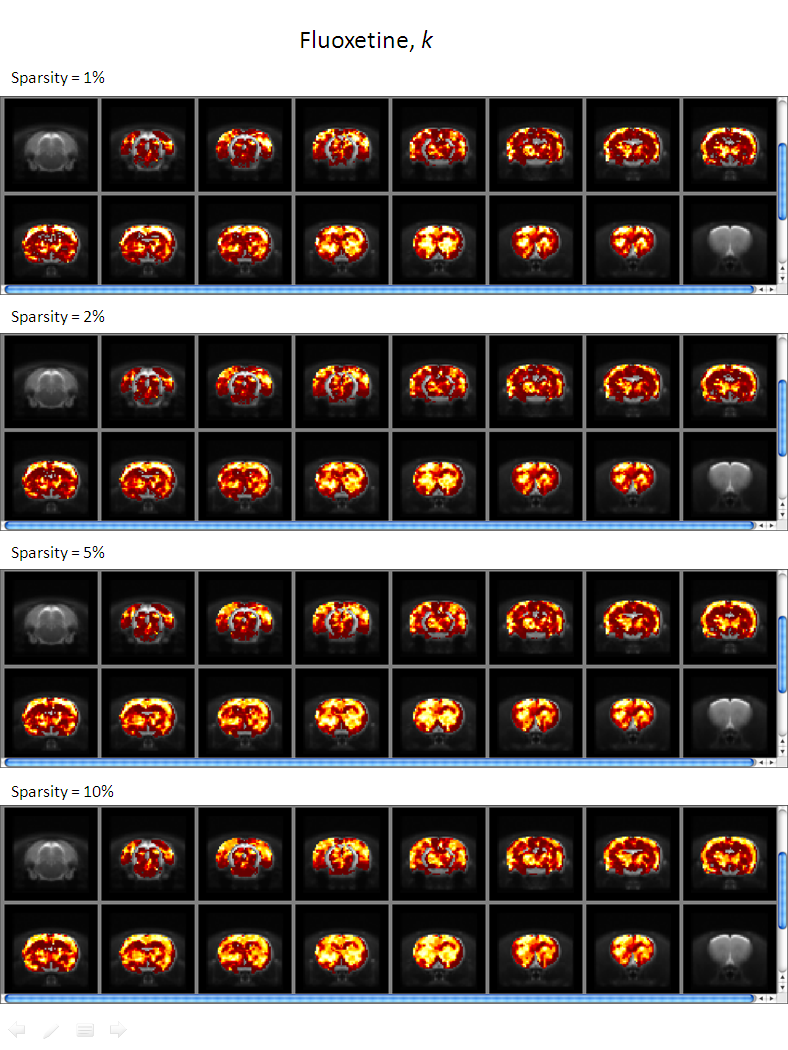


**Figure S3:** Maps of *k* as a function of binarization threshold, for the fluoxetine network.


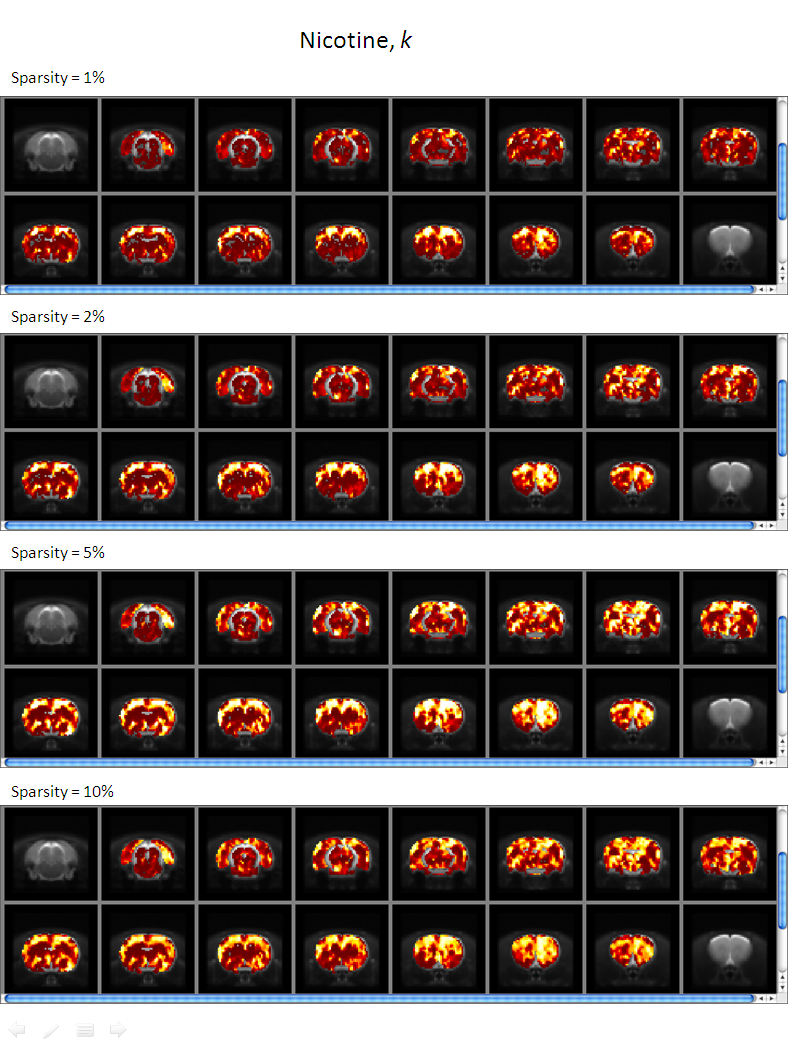


**Figure S4:** Maps of *k* as a function of binarization threshold, for the nicotine network.


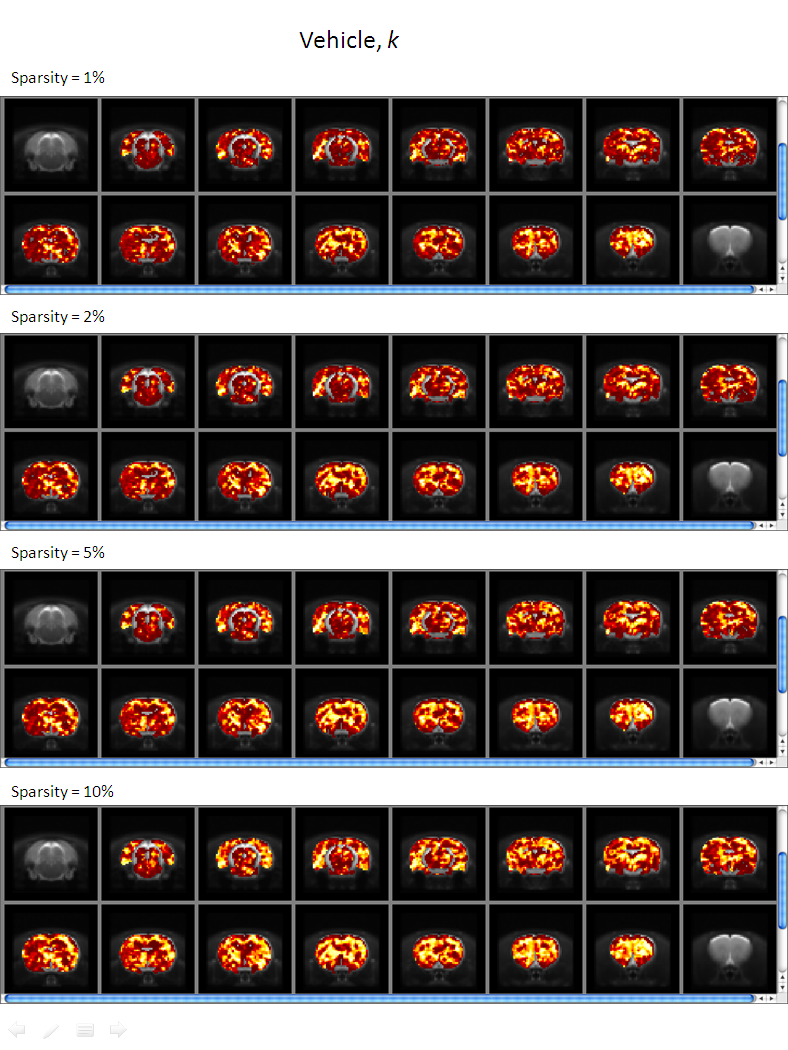


**Figure S5:** Maps of *k* as a function of binarization threshold, for the vehicle network.


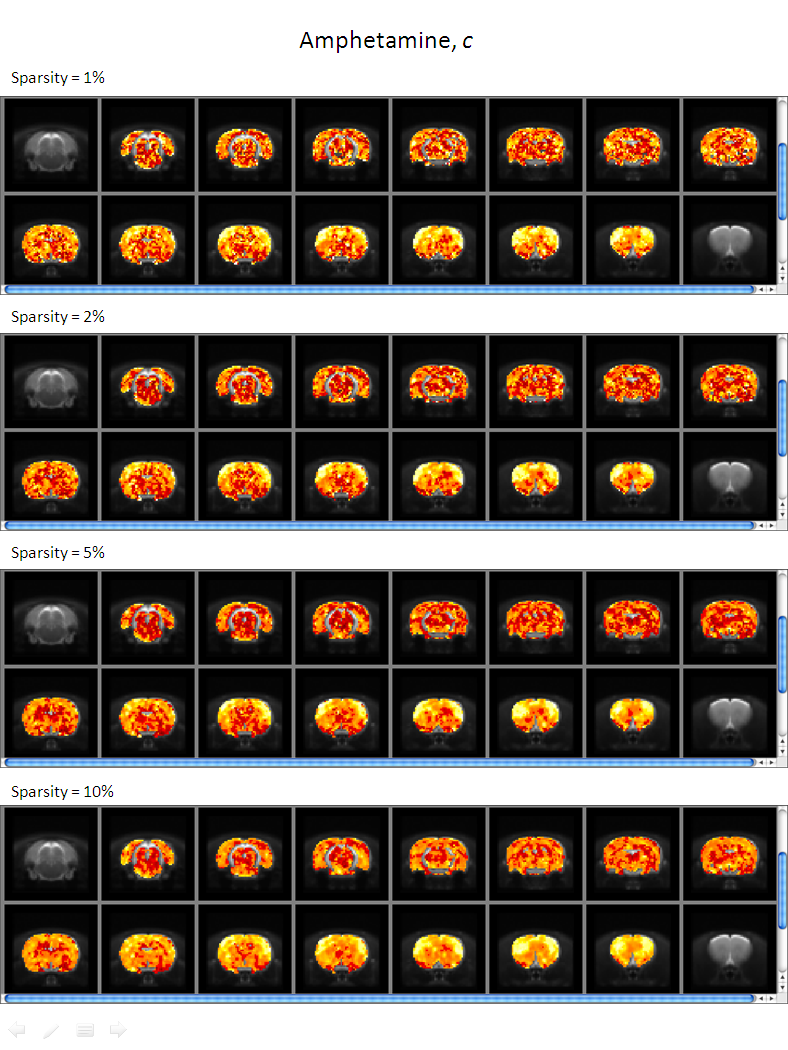


**Figure S6:** Maps of *c* as a function of binarization threshold, for the *d*-amphetamine network.


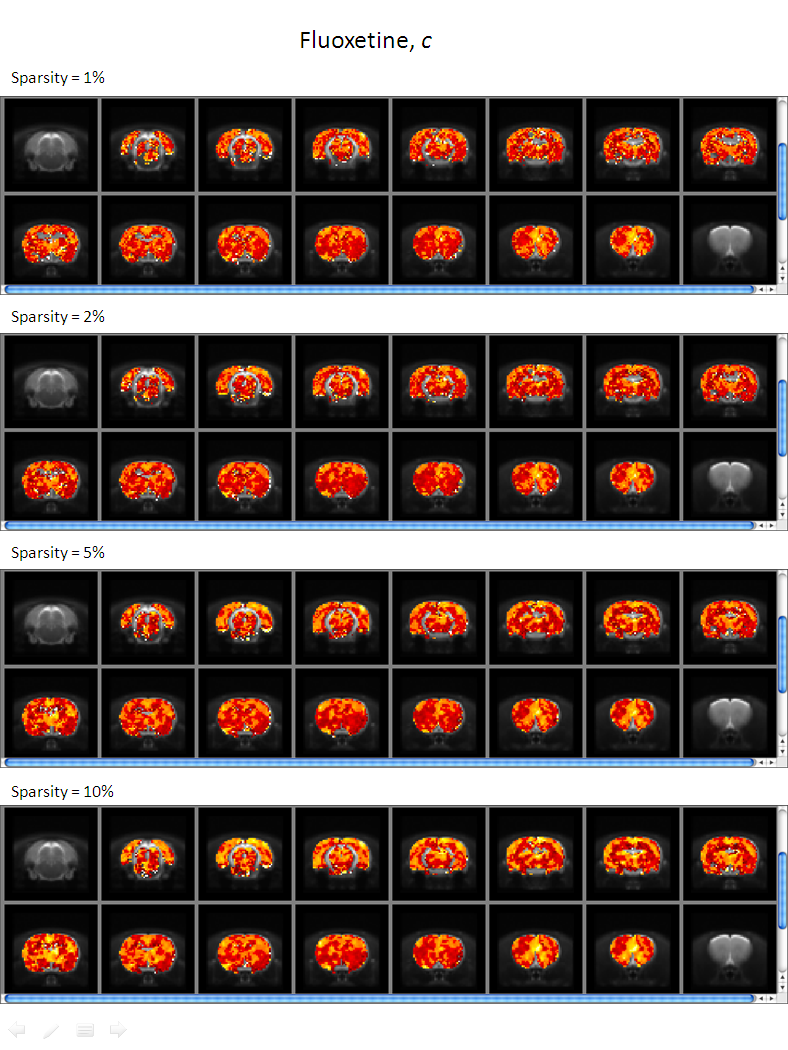


**Figure S7:** Maps of *c* as a function of binarization threshold, for the fluoxetine network


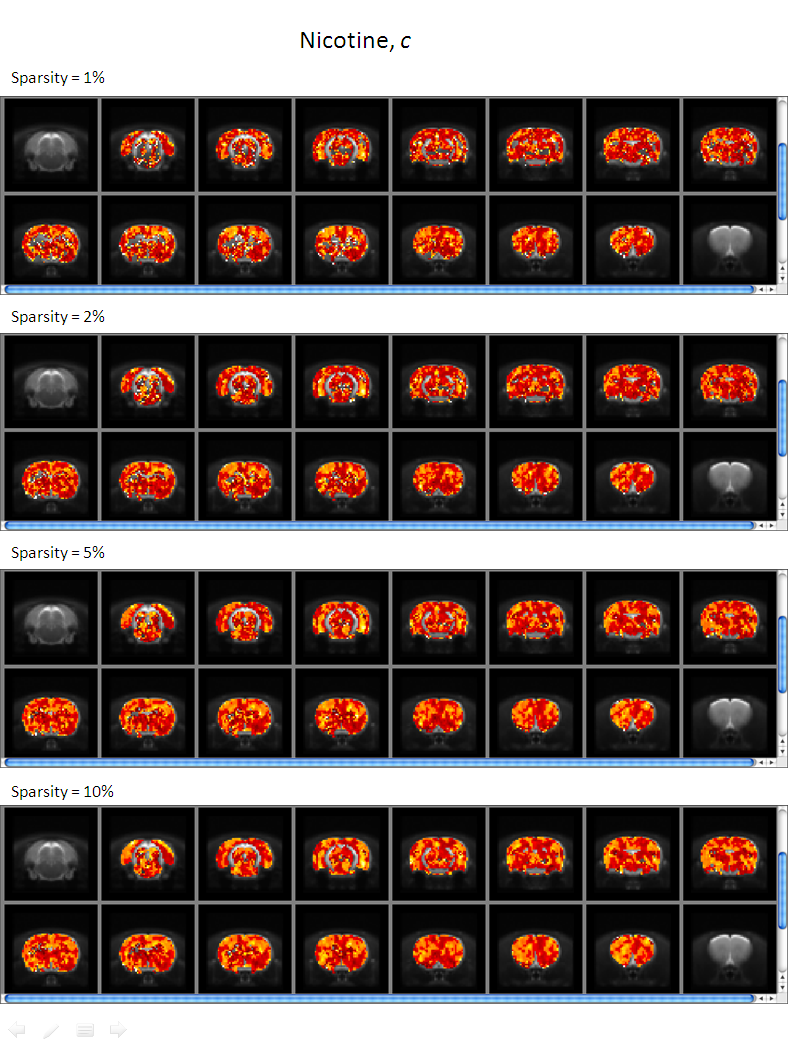


**Figure S8:** Maps of *c* as a function of binarization threshold, for the nicotine network.


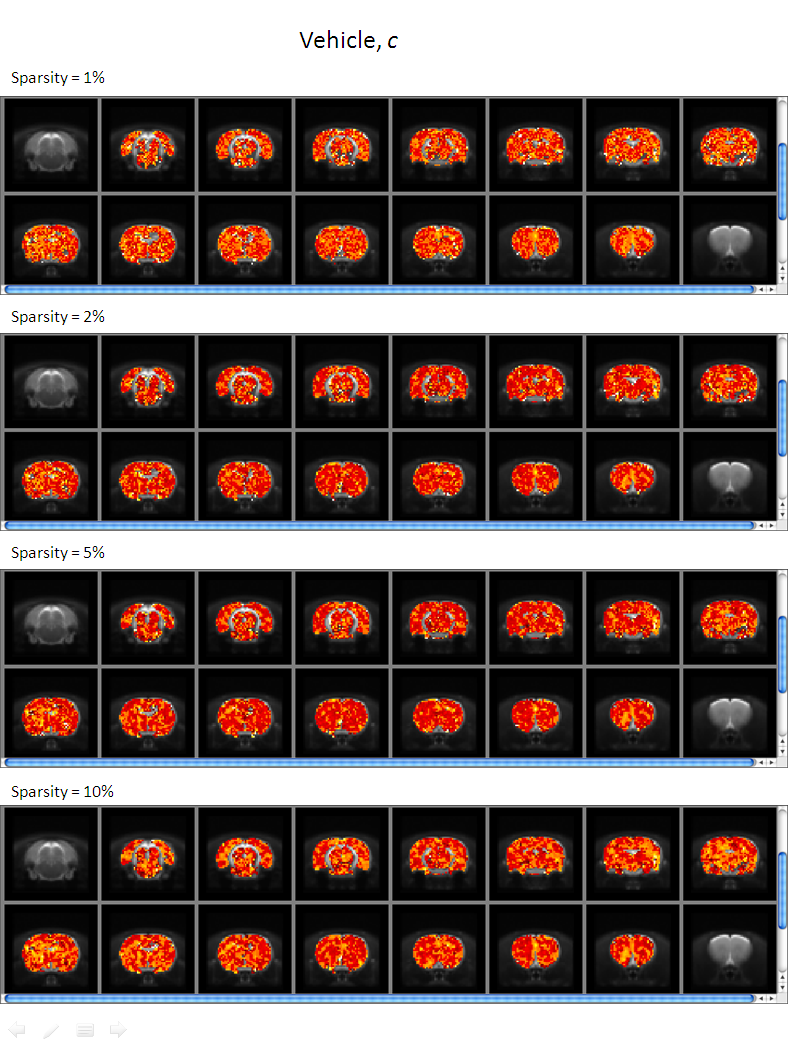


**Figure S9:** Maps of *c* as a function of binarization threshold, for the vehicle network.

1. **Maps of high-*k*, high-*c* and low-*c* nodes including the vehicle network**

In **Figure S10** we show the high-*k* and high-*c* nodes for the three active drug networks as well as the vehicle network. As explained in the manuscript, the vehicle histograms were considered as providing a ’null’ physiological baseline and used to define cutoff values for *k* and *c*. By construction, this thresholding retains a small fraction of nodes in the vehicle network; however it can be seen that at these same thresholds the active-drug networks show substantially more extended regions of elevated *k* and *c* (**Fig. S10**).


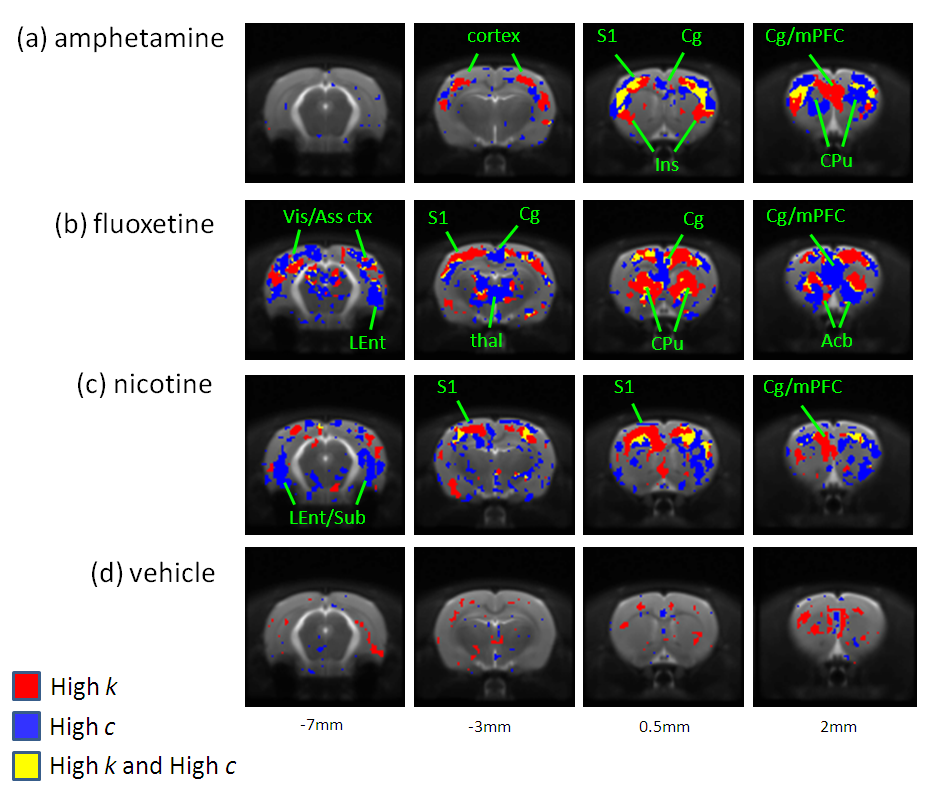


**Figure S10:** Maps of high-k and high-c nodes, from cutoffs based on the vehicle distributions (k>657, c>0.50).

In **Figure S11** we show maps of low-*c* nodes for all networks. These nodes are most extensive for the amphetamine network, and are preferentially localized to midbrain and subcortical structures. Comparing with results of the community structure partitioning of this same network (1), these low-*c* nodes correspond to voxels that were not retained in the two main modules following null-model thresholding.


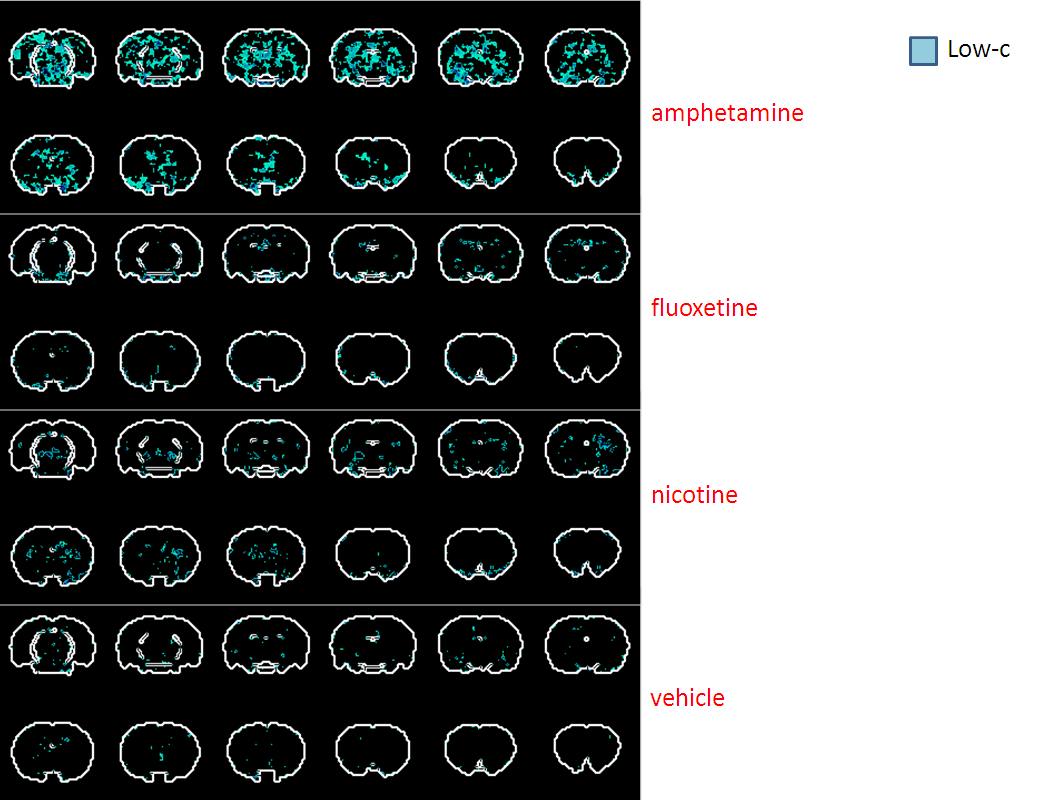


**Figure S11:** Maps of low-c nodes, from a cutoff based on the vehicle distribution (c<0.28).

References

1. Schwarz AJ, Gozzi A, Bifone A. Community structure in networks of functional connectivity: Resolving functional organization in the rat brain with pharmacological MRI. Neuroimage 2009.
